# Supplementary material for: Bach2 represses the AP-1-driven induction of interleukin-2 gene transcription in CD4+ T cells
Source: PubMed Central journal article supplement — BMB Rep. 2017 Sep 30;50(9):472–7. doi: 10.5483/BMBRep.2017.50.9.124 (PMC5625695; doi:10.5483/bmbrep.2017.50.9.124), 2017-09-30
Supplement: bmb-50-472_suppl.pdf [file bmb-50-472_suppl.pdf]

**Manuscript Type:** Article

**Title:** Bach2 represses the AP-1-driven induction of interleukin-2 gene transcription in CD4<sup>+</sup> T cells

**Author's name:** Eunkyeong Jang<sup>1</sup>, Hye Rim Lee<sup>1</sup>, Geon Hee Lee<sup>1</sup>, Ah-Reum Oh<sup>2</sup>, Ji-Young Cha<sup>2</sup>, Kazuhiko Igarashi<sup>3</sup>, and Jeehee Youn<sup>1\*</sup>

**Affiliation:** <sup>1</sup>Laboratory of Autoimmunology, Department of Anatomy and Cell Biology, College of Medicine, Hanyang University, Seoul, 0476, Korea; <sup>2</sup>Department of Biochemistry, Lee Gil Ya Cancer and Diabetes Institute, Gachon University, Incheon, 21936, Korea; <sup>3</sup>Department of Biochemistry, Tohoku University Graduate School of Medicine, Sendai 980-8575, Japan

**Running Title:** Bach2 represses IL-2

**Keywords:** Bach2, IL-2, CD4<sup>+</sup> T cells, repressor

**Corresponding Author:** Dr. Jeehee Youn. Phone: +82-2-2220-0604. Fax: +82-2-2281-7841.

e-mail: [jhyoun@hanyang.ac.kr](mailto:jhyoun@hanyang.ac.kr)

**Supplementary Table 1.** The primer sequences used for quantitative PCR

| <b>Genes or loci</b> | <b>Directions</b> | <b>Sequences</b>                     |
|----------------------|-------------------|--------------------------------------|
| human IL-2           | Forward           | 5'-AACTCCTGTCTTGCATTGCAC-3'          |
|                      | Backward          | 5'-GCTCCA GTTGTAGCTGTGTTT-3'         |
| mouse IL-2           | Forward           | 5'-GTGCTCTTGTCAACAGCG-3'             |
|                      | Backward          | 5'-GGG GAGTTTCAGGTTCCCTGTA-3'        |
| mouse Prdm1          | Forward           | 5'-TTCTTGTGTGGTATTGTCGGGACTT-3'      |
|                      | Backward          | 5'-TTGGGGACACTCTTTGGGTAGAGTT-3'      |
| mouse $\beta$ -actin | Forward           | 5'-GACGGCCAGGTCATCACTATTG-3'         |
|                      | Backward          | 5'-AGGAAGGCTGGAAAAGAGCC-3'           |
| human $\beta$ -actin | Forward           | 5'-AGA GCTACGAGCTGCCTGAC-3'          |
|                      | Backward          | 5'-AGCACTGTGTTGGCGTACAG-3'           |
| Site1                | Forward           | 5'-TTCACATGTTTCAGTGTAGTTTTATGACAA-3' |
|                      | Backward          | 5'-CGCCTTCTGTATGAA ACAGTTTTTC-3'     |
| Site2                | Forward           | 5'-GATTTACCTACATCCATTCAGTCA-3'       |
|                      | Backward          | 5'-ACCTGT CTGAAAAAACATTACCTTCA-3'    |
| Site3                | Forward           | 5'-TCCCTATCACTCTCTTTAATCACTACTCA-3'  |
|                      | Backward          | 5'-CACTGTTTGTGACAAGTGCAAGAC-3'       |
| human cyclophilin    | Forward           | 5'-TGC CATCGCCAAGGAGTAG-3'           |
|                      | Backward          | 5'-TGCACAGACGGTCACTCAA-3'            |
